# Supplementary material for: Mixed ionic-electronic conductivity of high-nickel, single-crystal cathodes influencing the cycling stability of all-solid-state lithium-ion batteries
Source: Royal Society of Chemistry journal article supplement (doi:10.1039/d4ta03727h), 2024-01-01
Supplement: d4ta03727h1.pdf [file d4ta03727h1.pdf]

## Supporting Information

### **Mixed Ionic-electronic Conductivity of High-nickel, Single-crystal Cathodes Influencing the Cycling Stability of All-solid-state Lithium-ion Batteries**

Steven Lee, Dongsoo Lee, and Arumugam Manthiram\*

Materials Science and Engineering Program & Texas Materials Institute, The University of Texas at Austin, Austin, TX, 78712-1591 USA

\*E-mail: [rmanth@mail.utexas.edu](mailto:rmanth@mail.utexas.edu)

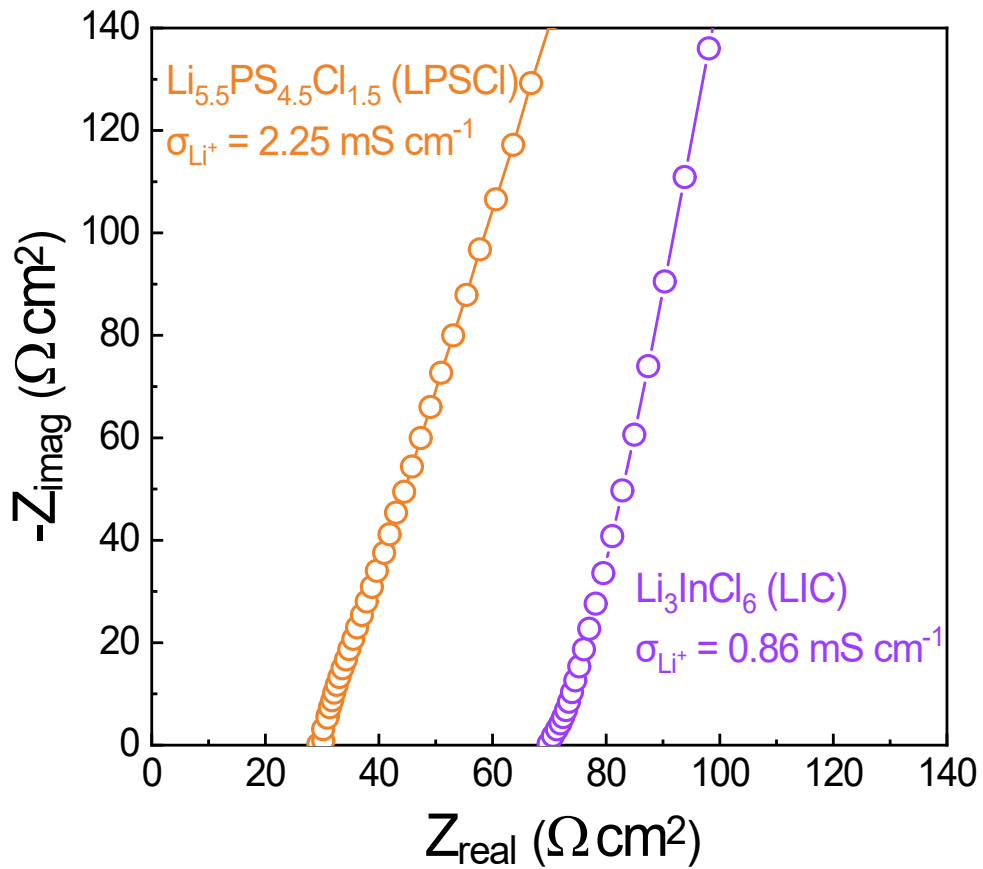

**Fig. S1** Electrochemical impedance spectroscopy (EIS) curves of  $\text{Li}_3\text{InCl}_6$  (LIC) and  $\text{Li}_{5.5}\text{PS}_{4.5}\text{Cl}_{1.5}$  (LPSCI), illustrating their ionic conductivities ( $\sigma_{\text{Li}^+}$ ) after pressing under 370 MPa in a solid-state cell setup. The pellet thickness is around 0.6 – 0.7 mm.





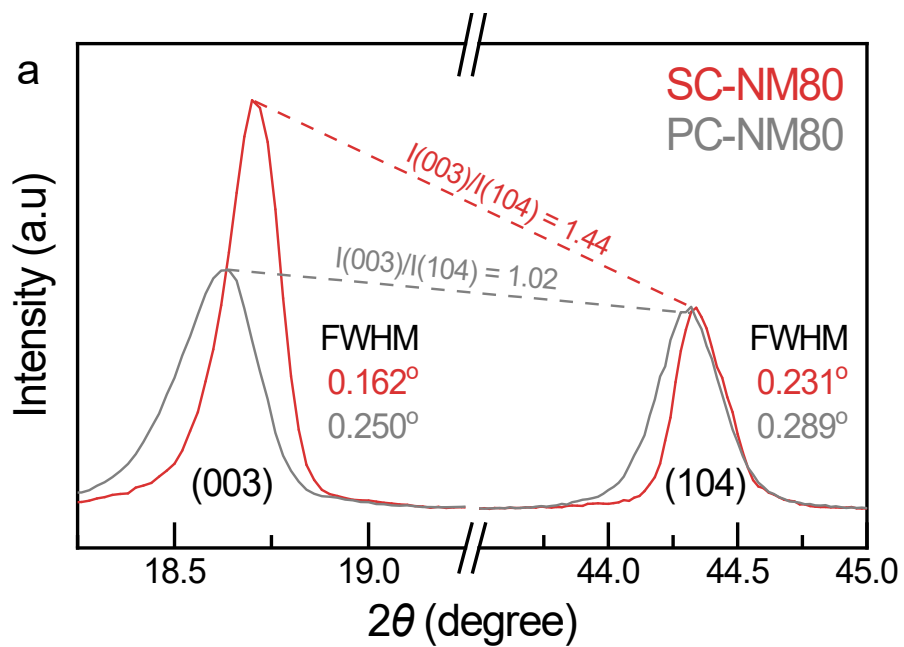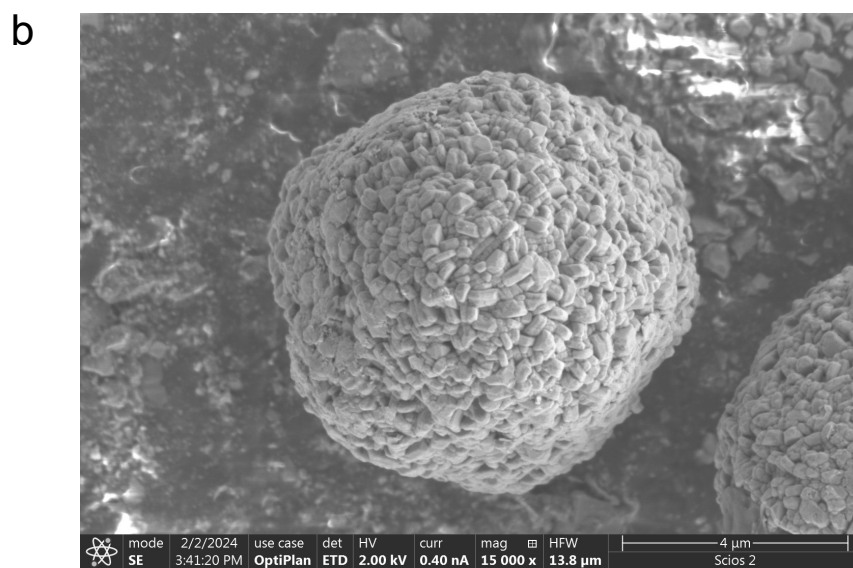

**Fig. S4** (a) Comparison of the XRD patterns of single-crystalline NM80 (SC-NM80) and polycrystalline NM80 (PC-NM80). (b) SEM image of PC-NM80.

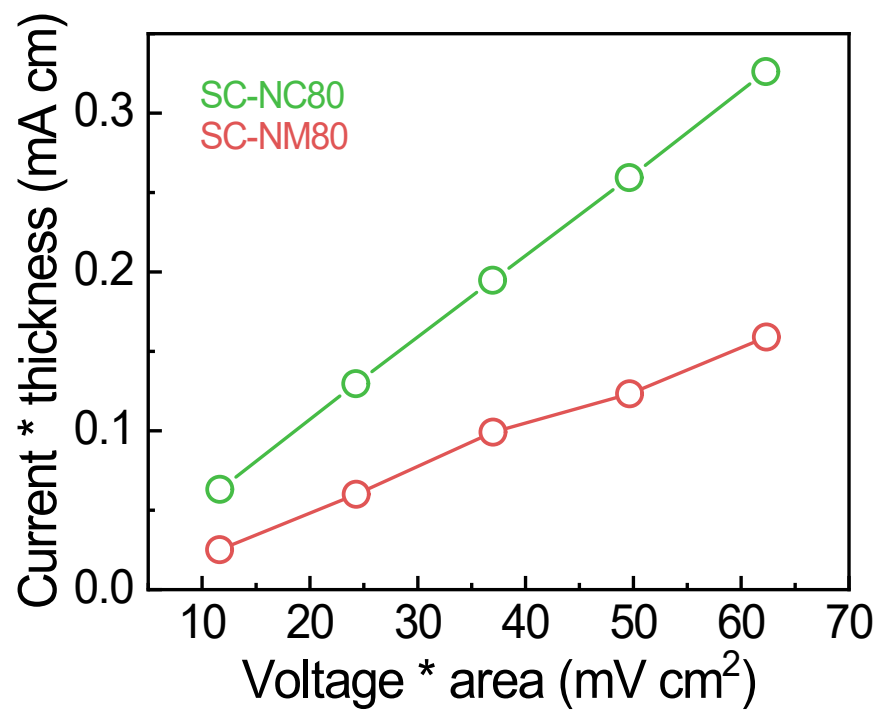

**Fig. S5** Current vs. voltage curves of ion-blocking cells containing electrodes with purely SC-NC80 or SC-NM80 from DC polarization testing. The current axis and voltage axis are scaled by the electrode thickness and area, respectively, to reveal the slope that corresponds to the electronic conductivity of the cathode sample.

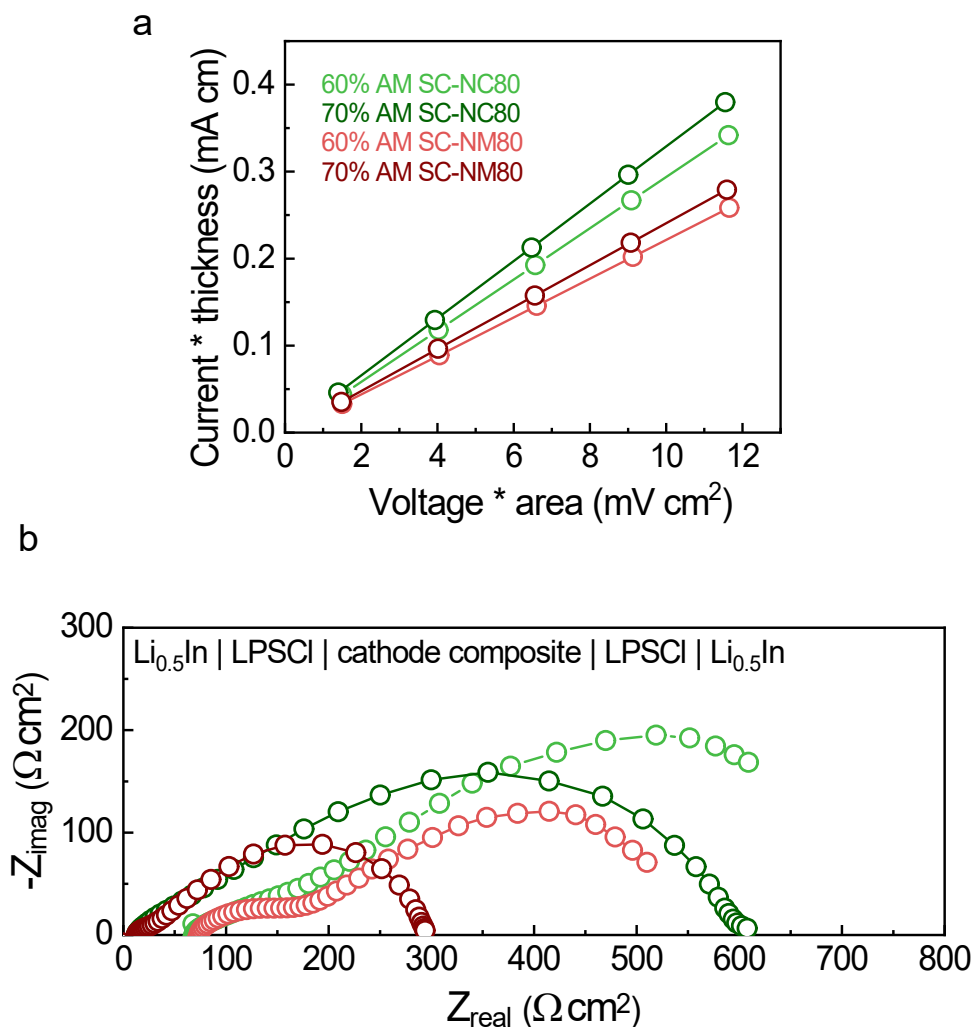

**Fig. S6** Conductivity measurements of SC-NC80 and SC-NM80 with 60% or 70% AM in the cathode composites. (a) Current vs. voltage curves of ion-blocking cells containing various cathode composites from DC polarization testing. The current axis and voltage axis are scaled by the electrode thickness and area, respectively, to reveal the slope that corresponds to the electronic conductivity of the cathode composite. (b) EIS curves of the cathode composites in an electron-blocking symmetric ASSB. In this test, the loading of 60% and 70% of SC-NC80 is around 1.5 times higher than that of 60% and 70% of SC-NM80, giving a false indication that the impedance of SC-NC80 cathode composites is higher.

**Table S1** XRD Rietveld refinement parameters of SC-NC80.

| <b>LiNi<sub>0.8</sub>Co<sub>0.2</sub>O<sub>2</sub> (SC-NC80)</b> |                  |                              |   |                                |                                        |                 |
|------------------------------------------------------------------|------------------|------------------------------|---|--------------------------------|----------------------------------------|-----------------|
| Space group: R-3m                                                |                  | I(003)/I(104) = 2.74         |   | FWHM <sub>(003)</sub> = 0.151  |                                        |                 |
| $a = 2.8672(1) \text{ \AA}$                                      |                  | $c = 14.1695(9) \text{ \AA}$ |   | $V = 100.879(8) \text{ \AA}^3$ |                                        |                 |
| $R_p = 19.5$                                                     |                  | $R_{wp} = 22.8$              |   | $R_{exp} = 9.84$               |                                        | $\chi^2 = 5.38$ |
| Atom                                                             | Wyckoff position | x                            | y | z                              | $\beta_{iso}^{-1}$                     | Occupancy       |
| Li1                                                              | 3a               | 0                            | 0 | 0                              | 0.943                                  | 1               |
| Ni1                                                              | 3b               | 0                            | 0 | 0.5                            | 0.295                                  | 0.8             |
| Ni2                                                              | 3a               | 0                            | 0 | 0                              | 0.295                                  | 0               |
| Co                                                               | 3b               | 0                            | 0 | 0.5                            | 0.295                                  | 0.2             |
| O                                                                | 6c               | 0                            | 0 | 0.2318(4)                      | $u_{11} = 0.0103$<br>$u_{33} = 0.0077$ | 2               |



**Table S2** XRD Rietveld refinement parameters of SC-NM80.

| <b>LiNi<sub>0.8</sub>Mn<sub>0.2</sub>O<sub>2</sub> (SC-NM80)</b> |                  |                               |   |                                 |                                        |                 |
|------------------------------------------------------------------|------------------|-------------------------------|---|---------------------------------|----------------------------------------|-----------------|
| Space group: R-3m                                                |                  | I(003)/I(104) = 1.44          |   | FWHM <sub>(003)</sub> = 0.162   |                                        |                 |
| $a = 2.8796(3) \text{ \AA}$                                      |                  | $c = 14.2372(14) \text{ \AA}$ |   | $V = 102.238(17) \text{ \AA}^3$ |                                        |                 |
| $R_p = 17.9$                                                     |                  | $R_{wp} = 19.5$               |   | $R_{exp} = 10.3$                |                                        | $\chi^2 = 3.61$ |
| Atom                                                             | Wyckoff position | x                             | y | z                               | $\beta_{iso}^1$                        | Occupancy       |
| Li1                                                              | 3a               | 0                             | 0 | 0                               | 0.943                                  | 0.9653(3)       |
| Li2                                                              | 3b               | 0                             | 0 | 0.5                             | 0.943                                  | 0.0347(3)       |
| Ni1                                                              | 3b               | 0                             | 0 | 0.5                             | 0.295                                  | 0.7653(3)       |
| Ni2                                                              | 3a               | 0                             | 0 | 0                               | 0.295                                  | 0.0347(3)       |
| Mn                                                               | 3b               | 0                             | 0 | 0.5                             | 0.295                                  | 0.2             |
| O                                                                | 6c               | 0                             | 0 | 0.2366(4)                       | $u_{11} = 0.0103$<br>$u_{33} = 0.0077$ | 2               |
